# Supplementary material
Source: PubMed Central journal article supplement (PMC7926264)
Supplement: NIHMS1657414-supplement-2.pdf [file NIHMS1657414-supplement-2.pdf]

**Supplemental table 2. Tarloxotinib-E inhibition of the ErbB family using biochemical kinase assays**

| <b>Kinase</b> | <b>IC<sub>50</sub> (nM)</b> |
|---------------|-----------------------------|
| EGFR          | <0.38                       |
| ERBB2/HER2    | <0.38                       |
| ERBB4/HER4    | <0.38                       |
