# Supplementary material
Source: PubMed Central journal article supplement (PMC7926264)
Supplement: NIHMS1657414-supplement-3.pdf [file NIHMS1657414-supplement-3.pdf]

## Supplementary Figure S1

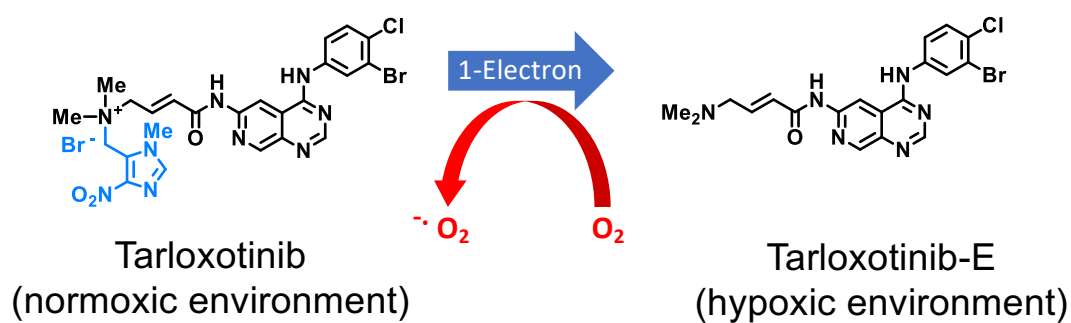

**Supplementary Figure S1.** Representation of tarloxotinib conversion to its irreversible EGFR/HER2 inhibitor. Attachment of a hypoxia trigger to tarloxotinib significantly reduces the potency of the prodrug, allowing for administration at higher relative concentrations than the cognate TKI (tarloxotinib-E).
