# Supplementary material
Source: PubMed Central journal article supplement (PMC7926264)
Supplement: NIHMS1657414-supplement-7.pdf [file NIHMS1657414-supplement-7.pdf]

# Supplementary Figure S5

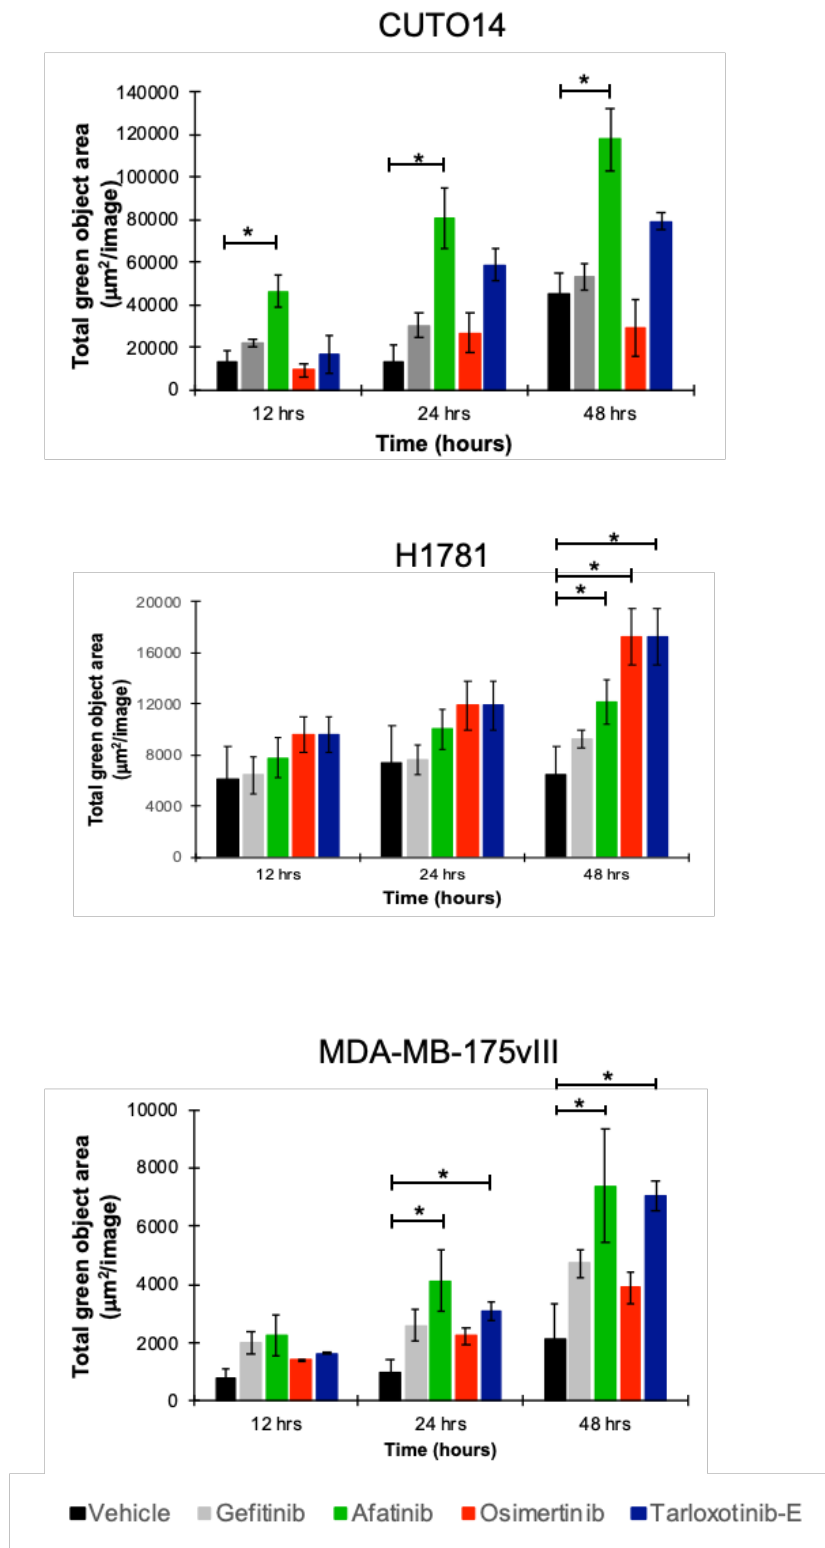

**Supplementary Figure S5. Tarloxotinib-E induces apoptosis in EGFR exon 20 insertion mutation, HER2 altered and NRG1 fusion cell lines.** Cells were labeled with caspase-3/7 green reagent and quantified in real time using the IncuCyte live-cell analysis system. Apoptotic cells were counted using the IncuCyte green object quantification for CUTO14, H1781 and MDA-MB-175vIII cells treated with 1  $\mu\text{mol/L}$  tarloxotinib-E, gefitinib, afatinib or osimertinib for the indicated times. Experiments were done in triplicate; mean  $\pm$  SEM is plotted. \*  $p < 0.05$ .
