# Supplementary material
Source: PubMed Central journal article supplement (PMC7926264)
Supplement: NIHMS1657414-supplement-8.pdf [file NIHMS1657414-supplement-8.pdf]

# Supplementary Figure S6

**A**

| Drug     | Human dose       | Human plasma AUC <sub>total</sub> (ng*hr/mL) | % free drug in human plasma | Human plasma AUC <sub>free</sub> (ng*hr/mL) | % free drug in mouse plasma | Total AUC in mouse plasma to achieve human AUC <sub>free</sub> | Nude mouse dose to match HED |
|----------|------------------|----------------------------------------------|-----------------------------|---------------------------------------------|-----------------------------|----------------------------------------------------------------|------------------------------|
| Afatinib | 40 mg daily (PO) | 324                                          | 8.21                        | 27                                          | 5.77                        | 468                                                            | 6 mg/kg daily (PO)           |

**B**

|                       | Mouse        | Human        |
|-----------------------|--------------|--------------|
| Fraction bound (±) SD | 94.23 ± 0.63 | 91.79 ± 0.46 |

**C**

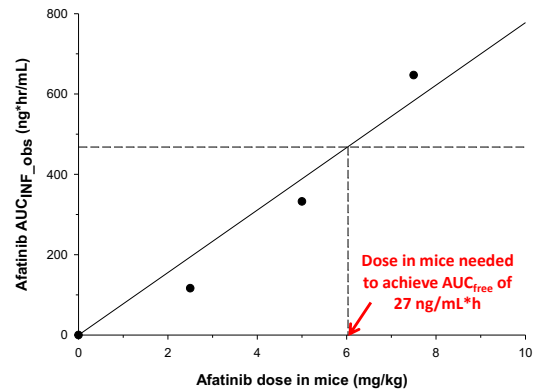

**D**

| Dose      | Afatinib plasma concentrations (ng/mL) ± SEM at various timepoints (h) |              |                |              |              |             |
|-----------|------------------------------------------------------------------------|--------------|----------------|--------------|--------------|-------------|
|           | 0.5 h                                                                  | 1 h          | 3 h            | 6 h          | 9 h          | 15 h        |
| 2.5 mg/kg | 5.68 ± 1.56                                                            | 6.34 ± 1.91  | 12.49 ± 2.13   | 15.34 ± 7.54 | 5.07 ± 1.10  | 0.89 ± 0.16 |
| 5 mg/kg   | 15.74 ± 0.97                                                           | 17.34 ± 4.07 | 49.87 ± 4.63   | 46.52 ± 8.94 | 7.93 ± 0.52  | 1.20 ± 0.60 |
| 7.5 mg/kg | 36.56 ± 5.66                                                           | 71.12 ± 2.86 | 118.18 ± 10.89 | 61.03 ± 3.87 | 12.15 ± 7.89 | 1.23 ± 0.12 |

**E**

| Dose      | C <sub>max</sub> (ng/mL) | T <sub>max</sub> (h) | Half-life (h) | AUC <sub>inf_obs</sub> (ng/mL*h) |
|-----------|--------------------------|----------------------|---------------|----------------------------------|
| 2.5 mg/kg | 15.34                    | 6                    | 2.21          | 116.32                           |
| 5 mg/kg   | 49.87                    | 3                    | 1.46          | 332.55                           |
| 7.5 mg/kg | 118.18                   | 3                    | 1.63          | 647.00                           |

**Supplementary Figure S6. Estimation of human equivalent dose of afatinib in nude mice.** **A)** Afatinib protein binding and plasma pharmacokinetic analysis in humans and mice. **B)** Fraction of afatinib bound to plasma proteins following micro-equilibrium dialysis with NIH-III mouse plasma and human plasma. **C)** Relationship between total plasma AUC for afatinib against dose in NIH-III mice based on values presented in B. **D)** Afatinib plasma pharmacokinetic analysis in mice. Nude mice dosed (p.o.) at 2.5 mg/kg, 5 mg/kg or 7.5 mg/kg and plasma harvested at timepoints mentioned below (N=3 mice per timepoint). **E)** Afatinib mouse plasma pharmacokinetic parameters based on data in D. Pharmacokinetic parameters estimated using non-compartmental analysis on Phoenix Winnollin.
