# Supplementary material
Source: PubMed Central journal article supplement (PMC7926264)
Supplement: NIHMS1657414-supplement-9.pdf [file NIHMS1657414-supplement-9.pdf]

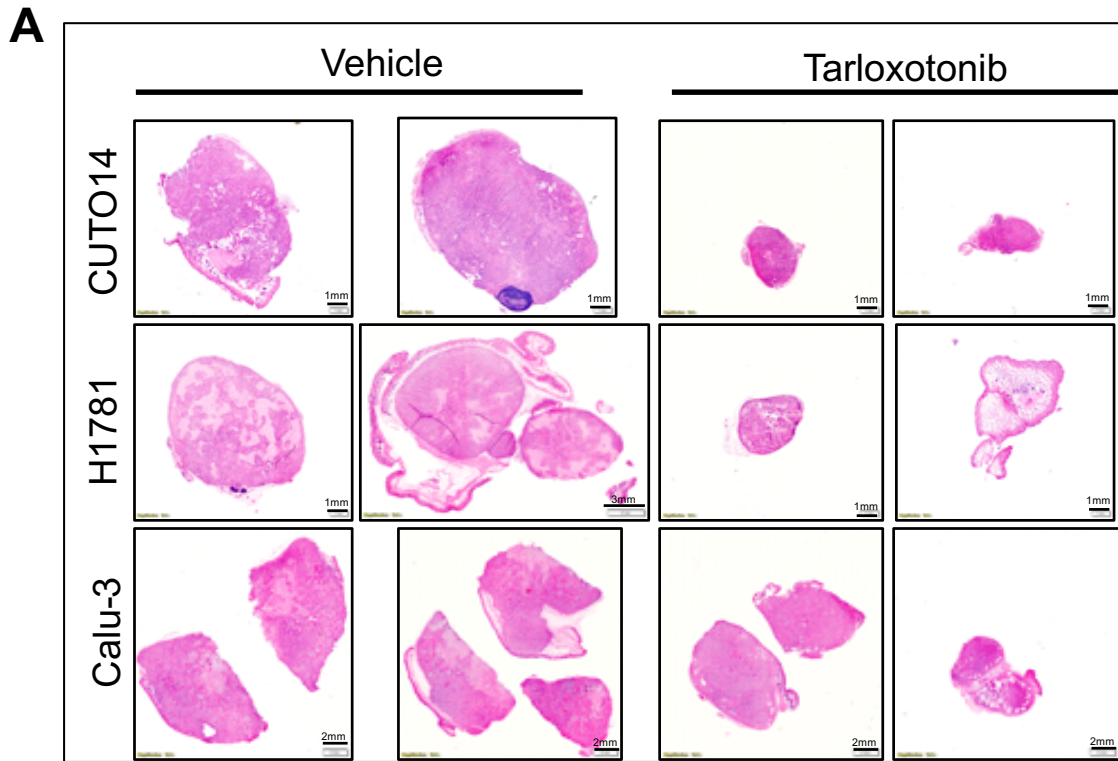

**B**

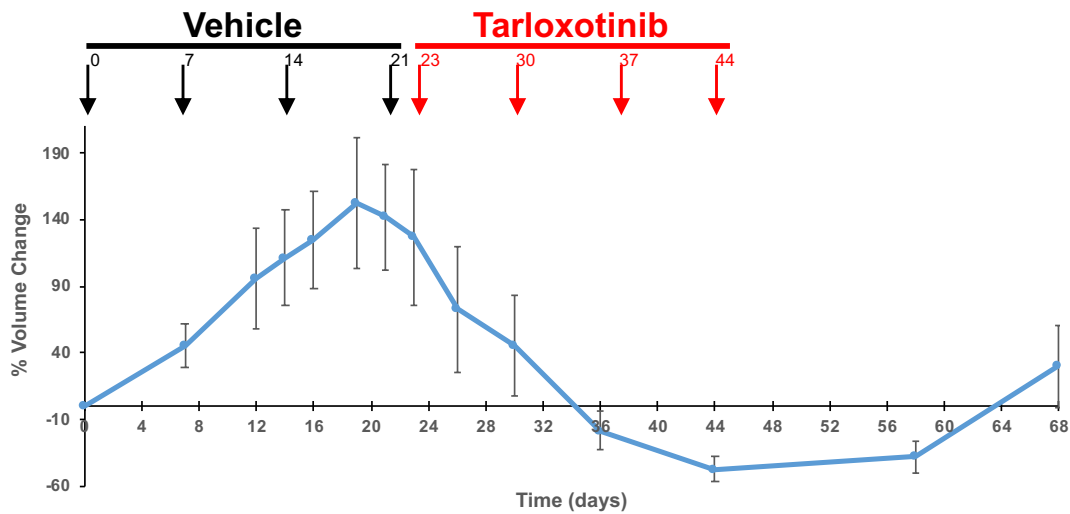

**Supplementary Figure S7. Tarloxotonib inhibits tumor growth of EGFR exon 20 mutant, HER2 gene altered, models *in vivo*.** **A)** Tumors were collected, fixed and paraffin embedded. H&E staining was carried out and pictures taken at 20x using an Olympus IX83 microscope. Scale bars are 1mm for CUTO14 and H1781 and 2mm for Calu-3 images. **B)** Mice xenografts from the vehicle group on figure 3 were treated with tarloxotonib for another four weeks. After the last dose, treatment was stopped, and measurements were continued until we observed an increase in tumor volume. Percent of volume change was calculated from the start of the experiment. Mean  $\pm$  SEM is plotted.
