# Supplementary material
Source: PubMed Central journal article supplement (PMC7926264)
Supplement: NIHMS1657414-supplement-10.pdf [file NIHMS1657414-supplement-10.pdf]

# Supplementary Figure S8

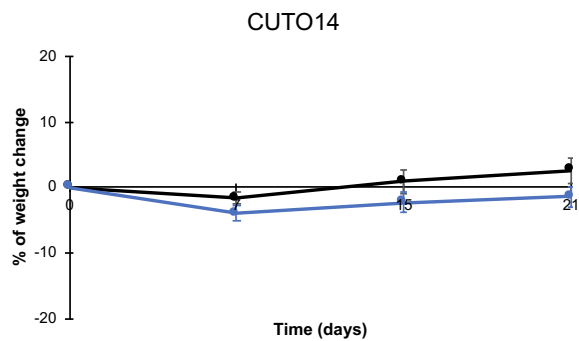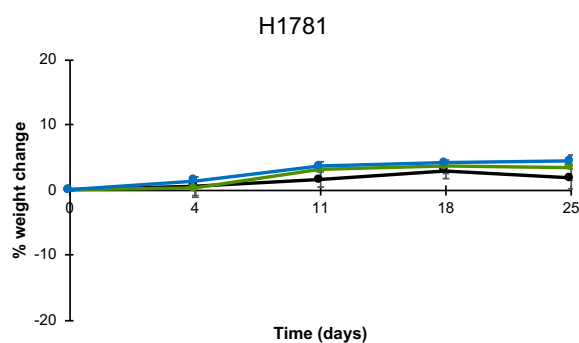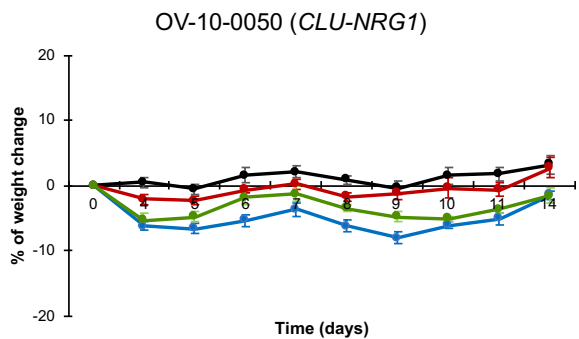

● Vehicle ● Afatinib ● Tarloxotinib 48mg/kg ● Tarloxotinib 26mg/kg

**Supplementary Figure S8. Body weight changes in tumor xenograft and PDX-bearing nude mice.** Mice weight was measured once a week during treatment and percent of weight change was calculated. Mean  $\pm$  SEM is plotted.
